# Supplementary material for: Limits on Medicare's Ability to Control Rising Spending on Cancer Drugs
Source: Atypon-hosted journal article supplement (doi:10.1056/nejmhpr0807774), 2009-01-28
Supplement: nejm_bach_626sa1.pdf [file nejm_bach_626sa1.pdf]

## Supplementary Appendix

This appendix has been provided by the author to give readers additional information about his work.

Supplement to: Bach PB. Limits on Medicare's ability to control rising spending on cancer drugs. *N Engl J Med* 2009;360:626-33. DOI: 10.1056/NEJMp0807774.

(PDF updated February 5, 2009.)

**METHODS**

All drugs approved by the US Food and Drug Administration for the treatment of cancer or myelodysplastic syndrome since 1965 were identified based on a search of lists obtained from the US Food and Drug Administration, the National Cancer Institute, the Association for Community Cancer Centers, and the National Comprehensive Cancer Network Compendium for Cancer. Drugs that were labeled only for the management of cancer related symptoms, management of cancer treatment side effects (e.g. anti-nausea agents), or para-neoplastic complications (e.g. octreotide acetate), and those labeled exclusively for the treatment of pediatric cancers (e.g. clofabrine) were not included.

The prices of drugs at the time of approval for their cancer indication are based on the allowable Medicare charge, or its equivalent, including payments derived from Medicare, patient and third party payor. So, for a Part B cancer drug, administered in the physician office, the listed price is 100% of the “allowed charge”, which is made up of Medicare’s portion (80% of the allowed charge), and the patient’s portion which is often covered by a third party payor (20% of the allowed charge). For oral drugs approved prior to 2006 and not covered under Medicare Part B, the price at the time of approval is based on the same formula used to reimburse Part B drugs during that year, even though some of these drugs were not covered by Medicare at the time. For cancer drugs covered in Part D from 2006 onward, the listed price is 100% of a representative prescription drug plan’s listed drug cost in 2008. Depending on the benefit structure, the actual cost of the drug can be borne entirely by the patient, entirely by the plan, or somewhere in-between.

The price listed is for a month of treatment determined by dividing a 12 week treatment course by 2.77 (the number of months in 12

weeks). The dosing regimen is for the first approved therapeutic cancer indication as listed on the FDA approved drug label for an adult weighing 70 kilograms, or with a body surface area of 1.7 meters squared. The use of a 12 week treatment period accommodated the reality that virtually all regimens are given in intervals that are factors of 12 (e.g. every other week, every third week).

There are a few drugs that are given for only a short period of time to reach the total dose. The price reported in these cases is the same as that for other drugs – the average over the 12 weeks, even if the total treatment duration is brief (e.g. gemtuzumab). The price reported is therefore much lower than the actual price during active treatment. When more than one dosing schedule was approved, the one that used a lower total amount of the drug was used for calculating the price.

**Table 1. Medicare reimbursement rule used to determine drug price**

| Year of approval                                            | Method for determining Medicare price                                                                                               |
|-------------------------------------------------------------|-------------------------------------------------------------------------------------------------------------------------------------|
| <b>Part B physician administered and covered oral drugs</b> |                                                                                                                                     |
| Prior to 1997                                               | 100% of the Average Wholesale Price at the time of approval                                                                         |
| 1997 - 2003                                                 | 95% of the Average Wholesale Price at the time of approval                                                                          |
| 2004                                                        | 85% of the Average Wholesale Price at the time of approval                                                                          |
| 2005 - 2007                                                 | 106% of the Average Sales Price at the time of approval                                                                             |
| 2008                                                        | Wholesale Acquisition Cost at the time of approval as reported by Manufacturer                                                      |
| <b>Part D oral drugs</b>                                    |                                                                                                                                     |
| prior to 2006                                               | Follows method above for Part B drugs                                                                                               |
| 2006 or later                                               | "Full Cost of Drug" as reported in the PlanFinder for the Humana PDP Enhanced plan for year 2008, ZIP code 10021 (www.medicare.gov) |

**Table 2. Price at introduction for cancer drugs**

| Generic Drug Name                       | Drug Trade Name         | Year of Approval | Monthly Medicare Price (USD, unadjusted, at time of approval) |
|-----------------------------------------|-------------------------|------------------|---------------------------------------------------------------|
| vinblastine                             | Velban                  | 1965             | 78                                                            |
| thioguanine, 6-TG                       | Thioguanine Tabloid     | 1966             | 17                                                            |
| hydroxyurea                             | Hydrea                  | 1967             | 14                                                            |
| cytarabine                              | Cytosar-U, Tarabine PFS | 1969             | 13                                                            |
| procarbazine                            | Matulane                | 1969             | 2                                                             |
| testolactone                            | Teslac                  | 1969             | 179                                                           |
| mitotane                                | Lysodren                | 1970             | 134                                                           |
| plicamycin                              | Mithracin               | 1970             | 50                                                            |
| mitomycin C                             | Mutamycin               | 1974             | 4                                                             |
| dacarbazine                             | DTIC-Dome               | 1975             | 29                                                            |
| lomustine                               | CeeNU                   | 1976             | 10                                                            |
| carmustine                              | BCNU, BiCNU             | 1977             | 33                                                            |
| tamoxifen citrate                       | Nolvadex                | 1977             | 44                                                            |
| cisplatin                               | Platinol                | 1978             | 125                                                           |
| estramustine                            | Emcyt                   | 1981             | 420                                                           |
| streptozocin                            | Zanosar                 | 1982             | 61                                                            |
| etoposide, VP-16                        | Vepesid                 | 1983             | 181                                                           |
| interferon alfa 2a                      | Roferon A               | 1986             | 742                                                           |
| daunorubicin, daunomycin                | Cerubidine              | 1987             | 533                                                           |
| doxorubicin hydrochloride for injection | Adriamycin              | 1987             | 521                                                           |
| mitoxantrone                            | Novantrone              | 1987             | 477                                                           |
| ifosfamide                              | IFEX                    | 1988             | 1,667                                                         |
| flutamide                               | Eulexin                 | 1989             | 213                                                           |
| altretamine                             | Hexalen                 | 1990             | 341                                                           |
| idarubicin                              | Idamycin                | 1990             | 227                                                           |
| levamisole                              | Ergamisol               | 1990             | 105                                                           |
| carboplatin                             | Paraplatin              | 1991             | 860                                                           |
| fludarabine phosphate                   | Fludara                 | 1991             | 662                                                           |
| pamidronate                             | Aredia                  | 1991             | 507                                                           |
| pentostatin                             | Nipent                  | 1991             | 1,767                                                         |
| aldesleukin                             | Proleukin               | 1992             | 13,503                                                        |
| melfhalan                               | Alkeran                 | 1992             | 35                                                            |
| cladribine                              | Leustatin, 2-CdA        | 1993             | 764                                                           |

| Generic Drug Name                  | Drug Trade Name                | Year of Approval | Monthly Medicare Price (USD, unadjusted, at time of approval) |
|------------------------------------|--------------------------------|------------------|---------------------------------------------------------------|
| asparaginase                       | Elspar                         | 1994             | 694                                                           |
| paclitaxel                         | Taxol                          | 1994             | 2,614                                                         |
| pegaspargase                       | Oncaspar                       | 1994             | 3,006                                                         |
| vinorelbine                        | Navelbine                      | 1994             | 1,035                                                         |
| anastrozole                        | Arimidex                       | 1995             | 189                                                           |
| bicalutamide                       | Casodex                        | 1995             | 311                                                           |
| doxorubicin hydrochloride liposome | Doxil, Dox-SL, Evacet, LipoDox | 1995             | 1,488                                                         |
| goserelin acetate                  | Zoladex                        | 1995             | 415                                                           |
| porfimer sodium                    | Photofrin                      | 1995             | 520                                                           |
| tretinoin, ATRA                    | Vesanoid                       | 1995             | 2,435                                                         |
| bleomycin                          | Blenoxane                      | 1996             | 421                                                           |
| daunorubicin liposomal             | DanuoXome                      | 1996             | 847                                                           |
| etoposide phosphate                | Etopophos                      | 1996             | 685                                                           |
| gemcitabine                        | Gemzar                         | 1996             | 2,129                                                         |
| irinotecan                         | Camptosar                      | 1996             | 5,326                                                         |
| nilutamide                         | Nilandron                      | 1996             | 320                                                           |
| topotecan                          | Hycamtin                       | 1996             | 2,344                                                         |
| letrozole                          | Femara                         | 1997             | 180                                                           |
| Rituximab                          | Rituxan                        | 1997             | 3,475                                                         |
| toremifene                         | Fareston                       | 1997             | 93                                                            |
| BCG Live                           | TICE BCG                       | 1998             | 53                                                            |
| capecitabine                       | Xeloda                         | 1998             | 1,045                                                         |
| leuprolide; leuprolide acetate     | Eligard, Lupron, Lupron Depot  | 1998             | 206                                                           |
| trastuzumab                        | Herceptin                      | 1998             | 3,208                                                         |
| valrubicin                         | Valstar                        | 1998             | 3,209                                                         |
| bexarotene                         | Targretin                      | 1999             | 2,361                                                         |
| busulfan                           | Busulfex                       | 1999             | 1,427                                                         |
| cytarabine liposomal               | DepoCyt                        | 1999             | 3,351                                                         |
| denileukin                         | Ontak                          | 1999             | 14,291                                                        |
| docetaxel                          | Taxotere                       | 1999             | 2,610                                                         |
| epirubicin hydrochloride           | Ellence                        | 1999             | 2,295                                                         |
| exemestane                         | Aromasin                       | 1999             | 205                                                           |
| methoxsalen                        | Uvadex                         | 1999             | 80                                                            |
| temozolomide                       | Temodar                        | 1999             | 1,574                                                         |
| arsenic trioxide                   | Trisenox                       | 2000             | 5,400                                                         |

| Generic Drug Name                                               | Drug Trade Name                         | Year of Approval | Monthly Medicare Price (USD, unadjusted, at time of approval) |
|-----------------------------------------------------------------|-----------------------------------------|------------------|---------------------------------------------------------------|
| gemtuzumab<br>ozogamicin                                        | Mylotarg                                | 2000             | 4,262                                                         |
| triptorelin<br>pamoate                                          | Trelstar Depot                          | 2000             | 450                                                           |
| alemtuzumab                                                     | Campath                                 | 2001             | 19,925                                                        |
| imatinib mesylate                                               | Gleevec                                 | 2001             | 3,401                                                         |
| fulvestrant                                                     | Faslodex                                | 2002             | 948                                                           |
| ibritumomab<br>tiuxetan                                         | Zevalin                                 | 2002             | 1,000                                                         |
| oxaliplatin                                                     | Eloxatin                                | 2002             | 5,911                                                         |
| zoledronic acid                                                 | Zometa                                  | 2002             | 881                                                           |
| abarelix                                                        | Plenaxis depot                          | 2003             | 2,607                                                         |
| bortezomib                                                      | Velcade                                 | 2003             | 3,392                                                         |
| gefitinib                                                       | Iressa                                  | 2003             | 1,608                                                         |
| Tositumomab                                                     | Bexxar                                  | 2003             | 1,449                                                         |
| azacitidine                                                     | Vidaza                                  | 2004             | 3,909                                                         |
| bevacuzimab                                                     | Avastin                                 | 2004             | 4,430                                                         |
| cetuximab                                                       | Erbitux                                 | 2004             | 9,465                                                         |
| erlotinib                                                       | Tarceva                                 | 2004             | 4,174                                                         |
| pemetrexed<br>disodium                                          | Alimta                                  | 2004             | 5,086                                                         |
| lenalidomide                                                    | Revlimid                                | 2005             | 7,989                                                         |
| nelarabine                                                      | Arranon                                 | 2005             | 19,425                                                        |
| paclitaxel<br>albumin-stabilized<br>nanoparticle<br>formulation | Abraxane,<br>Nanoparticle<br>Paclitaxel | 2005             | 5,640                                                         |
| sorafenib                                                       | Nexavar                                 | 2005             | 5,097                                                         |
| dasatinib                                                       | Sprycel                                 | 2006             | 4,529                                                         |
| decitabine                                                      | Dacogen                                 | 2006             | 4,652                                                         |
| panitumumab                                                     | Vectibix                                | 2006             | 7,991                                                         |
| sunitinib maleate                                               | Sutent                                  | 2006             | 4,590                                                         |
| thalidomide                                                     | Thalomid                                | 2006             | 5,613                                                         |
| vorinostat                                                      | Zolinza                                 | 2006             | 8,134                                                         |
| ixabepilone                                                     | Ixempra                                 | 2007             | 6,781                                                         |
| Lapatinib<br>ditosylate                                         | Tykerb                                  | 2007             | 3,124                                                         |
| nilotinib                                                       | Tasigna                                 | 2007             | 6,140                                                         |
| temsirolimus                                                    | Torisel                                 | 2007             | 5,497                                                         |
| Bendamustine<br>hydrochloride                                   | Treanda                                 | 2008             | 7,023                                                         |
